1 **Tomato fruit susceptibility to fungal disease can be uncoupled from ripening**  
2 **by suppressing susceptibility factors**

3 Christian J. Silva<sup>1</sup>, Casper van den Abeele<sup>1,2</sup>, Isabel Ortega-Salazar<sup>1</sup>, Victor Papin<sup>1,3</sup>, Jaclyn A.  
4 Adaskaveg<sup>1</sup>, Duoduo Wang<sup>4,5</sup>, Clare L. Casteel<sup>4</sup>, Graham B. Seymour<sup>5</sup>, Barbara Blanco-Ulate\*<sup>1</sup>

5 <sup>1</sup> Department of Plant Sciences, University of California, Davis, Davis, CA, United States

6 <sup>2</sup> Laboratory of Plant Physiology, Wageningen University, Wageningen, the Netherlands

7 <sup>3</sup> Ecole Nationale Supérieure Agronomique de Toulouse, Toulouse, France

8 <sup>4</sup> School of Integrative Plant Science, Cornell University, Ithaca, NY, United States

9 <sup>5</sup> School of Biosciences, Plant and Crop Science Division, University of Nottingham, Sutton  
10 Bonington, Loughborough LE12 5RD, United Kingdom

11 cjsilva@ucdavis.edu

12 c.van.den.abeele@rijkszwaaan.nl

13 iortegasalazar@ucdavis.edu

14 victorpapin.ensat@gmail.com

15 jaadaskaveg@ucdavis.edu

16 dw538@cornell.edu

17 ccasteel@cornell.edu

18 graham.seymour@nottingham.ac.uk

19 \* Correspondence: Telephone: +1 (530) 752 9690. Email: bblanco@ucdavis.edu

20 Date of submission: June 3, 2020. Number of tables and figures (and supplemental): 6 figures, 2  
21 tables, 2 supplemental figures, and 5 supplemental tables. All figures should be in color online-  
22 only. Word count: 6,497.

23 **Tomato fruit susceptibility to fungal disease can be uncoupled from ripening by**  
24 **suppressing susceptibility factors**

25 **Running title:** Tomato fruit susceptibility to fungal disease

26 **Highlight:** Increased susceptibility to fungal disease during tomato ripening is driven by the  
27 accumulation of susceptibility factors and not the lack of defense responses.

28 **Abstract**

29 The increased susceptibility of ripe fruit to fungal pathogens poses a substantial threat to  
30 crop production and marketability. Here, we coupled transcriptomic analyses with mutant studies  
31 to uncover critical processes associated with defenses and susceptibility in tomato (*Solanum*  
32 *lycopersicum*) fruit. Using unripe and ripe fruit inoculated with three fungal pathogens, we  
33 identified common pathogen responses reliant on chitinases, WRKY transcription factors, and  
34 reactive oxygen species detoxification. We established that the magnitude and diversity of  
35 defense responses do not significantly impact the interaction outcome, as susceptible ripe fruit  
36 mounted a strong defense response to pathogen infection. Then, to distinguish features of  
37 ripening that may be responsible for susceptibility, we utilized non-ripening tomato mutants that  
38 displayed different susceptibility patterns to fungal infection. Based on transcriptional and  
39 hormone profiling, susceptible tomato genotypes had losses in the maintenance of cellular redox  
40 homeostasis, while jasmonic acid accumulation and signaling coincided with defense activation  
41 in resistant fruit. We identified and validated a susceptibility factor, pectate lyase (*PL*). CRISPR-  
42 based knockouts of *PL*, but not polygalacturonase (*PG2a*), reduced susceptibility of ripe fruit by  
43 >50%. This study suggests that targeting specific genes that drive susceptibility is a viable  
44 strategy to improve the resistance of tomato fruit against fungal disease.

45  
46 **Keywords**

47 *Botrytis cinerea*, defense responses, fruit-pathogen interactions, fruit ripening, *Fusarium*  
48 *acuminatum*, non-ripening mutants, pectate lyase, preformed defenses, *Rhizopus stolonifer*,  
49 susceptibility factors

## 50 **Introduction**

51 Half of all fruits and vegetables produced globally are lost each year (Gustavsson *et al.*,  
52 2011). While the causes of losses vary by region and commodity, fungal phytopathogens have a  
53 widespread role, as 20-25% of all harvested fruits and vegetables are lost to rotting caused by  
54 such fungi (Sharma *et al.*, 2009). In fleshy fruit, this issue is exacerbated because, in general,  
55 fruit become more susceptible to fungal pathogens as they ripen (Prusky, 1996; Blanco-Ulate *et*  
56 *al.*, 2016). Ripening-associated susceptibility has been demonstrated in multiple commodities  
57 including climacteric fruit such as tomato, stone fruit, banana, apple, and pear, as well as non-  
58 climacteric fruit such as strawberry, cantaloupe, citrus, and pineapple (Zhang *et al.*, 1999; Gell *et*  
59 *al.*, 2008; Morales *et al.*, 2008; Cantu *et al.*, 2009; Lassois *et al.*, 2010; Chiu *et al.*, 2013; Alkan  
60 *et al.*, 2015; Petrasch *et al.*, 2019; Lafuente *et al.*, 2019; Barral *et al.*, 2019).

61 The most devastating postharvest pathogens in fruit are those with necrotrophic lifestyles,  
62 which deliberately kill host tissue, resulting in rotting. Example pathogens include the model  
63 necrotrophic fungi *Botrytis cinerea* and *Sclerotinia sclerotiorum* as well as *Monilinia* spp.,  
64 *Alternaria* spp., *Rhizopus* spp., *Penicillium* spp., and *Fusarium* spp. (Nunes, 2012; Bautista-  
65 Baños, 2014; van Kan *et al.*, 2014; Liang and Rollins, 2018; Petrasch *et al.*, 2019). Plant defense  
66 responses against necrotrophic fungi are multi-layered, involving (1) recognition of pathogen-  
67 associated molecular patterns (PAMPs), such as chitin or chitosan, by pattern recognition  
68 receptors (PRRs), (2) intracellular signaling through mitogen-activated protein (MAP) kinase  
69 cascades, (3) induction of downstream defenses by coordinated activity of phytohormones,  
70 particularly ethylene and jasmonic acid (JA), (4) cell wall fortifications, and (5) production of  
71 various secondary metabolites and antifungal proteins (van der Ent and Pieterse, 2012; Mbengue  
72 *et al.*, 2016; Pandey *et al.*, 2016; AbuQamar *et al.*, 2017; Veloso and van Kan, 2018). However,  
73 most defense strategies have been studied in leaves, and their utilization and effectiveness in fruit  
74 have been assessed only with single pathogens (Cantu *et al.*, 2009; Alkan *et al.*, 2015; Ahmadi-  
75 Afzadi *et al.*, 2018).

76 The outcome of any fruit-necrotroph interaction relies on the balance between the  
77 presence or induction of defenses and the contributions of susceptibility factors. Though induced  
78 defenses are heavily studied in plant immunity, the impact of preformed (or ‘constitutive’)  
79 defenses and susceptibility factors are less researched (van Schie and Takken, 2014). Preformed  
80 defenses include structural barriers, such as the cell wall and cuticle, and the accumulation of

81 secondary metabolites (Wittstock and Gershenzon, 2002; Veronese *et al.*, 2003), while  
82 susceptibility factors include the abundance of simple sugars and organic acids or activity of host  
83 cell wall modifying proteins (Cantu *et al.*, 2008; Centeno *et al.*, 2011). A sufficient  
84 understanding of ripening-associated susceptibility requires a characterization of the ripening  
85 program's impact on (1) the ability of the host to express necessary defense genes upon pathogen  
86 challenge, (2) the integrity of preformed defenses, and (3) the abundance of susceptibility  
87 factors.

88 In this study, we first applied a transcriptomic approach to characterize core tomato fruit  
89 responses to three fungal pathogens and changes in gene expression that occur during ripening to  
90 promote susceptibility. To identify core responses that are not merely pathogen-specific, we used  
91 three pathogens with necrotrophic infection strategies: *B. cinerea*, *Rhizopus stolonifer*, and  
92 *Fusarium acuminatum*. Using well-established defense gene classifications, we developed  
93 profiles of host defense gene expression responses in unripe and ripe fruit. We then determined  
94 the susceptibility phenotypes of three non-ripening mutants: *Colorless non-ripening (Cnr)*,  
95 *ripening inhibitor (rin)*, and *non-ripening (nor)*, which have unique defects in ripening features  
96 (Vrebalov *et al.*, 2002; Giovannoni *et al.*, 2004; Manning *et al.*, 2006; Ito *et al.*, 2017; Wang *et al.*  
97 *et al.*, 2019b; Gao *et al.*, 2019, 2020). After demonstrating that each mutant has distinct  
98 susceptibility to disease, we identified ripening genes whose expression changes may impact the  
99 disease outcome. By integrating our transcriptomic data and mutant analyses, we found  
100 preformed defenses and susceptibility factor candidates associated with *B. cinerea* infections.  
101 Using CRISPR-based mutants, we established that one candidate, the pectin-degrading enzyme  
102 pectate lyase is indeed a disease susceptibility factor in tomato fruit.

103

## 104 **Materials and methods**

### 105 **Plant material**

106 Tomato (*Solanum lycopersicum*) c.v. 'Ailsa Craig' (AC), isogenic non-ripening mutants  
107 *rin*, *nor*, and *Cnr*, and CRISPR-based *PL* (PL5-4) and *PG2a* (PG21) mutants with azygous  
108 control plants (Wang *et al.*, 2019a) were grown under standard field conditions in the  
109 Department of Plant Sciences Field Facilities at the University of California, Davis. Fruit were  
110 tagged at three days post-anthesis (dpa) and harvested at 31 dpa for mature green (MG) and at 42

111 dpa for red ripe (RR) or equivalent for ripening mutants. Ripening stages were confirmed by the  
112 color, size, and texture of the fruit.

113 The CRISPR line genotypes were confirmed by PCR of DNA prepared from leaf punches  
114 using Thermo Scientific Phire Plant Direct PCR Kits (Thermo Fisher Scientific, Waltham, MA,  
115 USA). Genes were amplified using the Phire PCR enzyme in thermocycler conditions: 98 °C  
116 denaturation for 5 min; 35 cycles of 98 °C for 5 s, 56 °C for 5 s, 72 °C for 20 s; and a final 1 min  
117 extension of 72 °C. The PCR products were column purified and Sanger sequenced. The primers  
118 were CAAAGGAATAGTATTCTCCTTCTC/CAGTTCCATGGAAAATGACTTTC for PG21  
119 and GTGGTACCGGAAATCCAATC/CAATGATCCACCCAAACATG for PL5-4.

### 120 **Fungal culture and fruit inoculation**

121 *R. stolonifer* and *F. acuminatum* isolates were taken from infections of produce and  
122 identified through morphological and sequencing methods (Petrasch *et al.*, 2019). *B. cinerea*  
123 (B05.10), *R. stolonifer*, and *F. acuminatum* cultures were grown on 1% potato dextrose agar  
124 media. Conidia were harvested from sporulating cultures in 0.01% TWEEN<sup>®</sup> 20 (Sigma-Aldrich  
125 Corporation, USA) and counted. Spore suspensions were stored for less than a month at -20 °C  
126 until use. Immediately prior to inoculation, spores were diluted with sterile milli-Q water to 500  
127 conidia/μL, 30 conidia/μL, or 1000 conidia/μL for *B. cinerea*, *R. stolonifer*, and *F. acuminatum*,  
128 respectively. Fruit were surface disinfected by dipping twice in a 10% NaOCl solution for 30 s  
129 and followed by a deionized water wash. The blossom end halves of fungal-inoculated and  
130 wounded fruit were punctured to ca. 2 mm depth and ca. 1 mm diameter using a sterile  
131 micropipette tip. Each fruit used to measure disease incidence and severity was punctured at six  
132 sites; each fruit used for RNA extraction and transcriptomic analysis was punctured at 15 sites.  
133 For inoculated fruit, each puncture site was inoculated with 10 μL of spore solution, while no  
134 inoculum was introduced at puncture sites on wounded fruit. Healthy controls were not wounded  
135 or inoculated. Fruit were incubated for up to three days at 25 °C in high-humidity containers.  
136 Each biological replicate of each treatment (i.e. combination of genotype, ripening stage, and  
137 infection status) consisted of approximately eight fruit. Five biological replicates of each  
138 treatment were used for transcriptomic analysis, and four biological replicates of each treatment  
139 were used for measurements of disease progression.

## 140 **Disease incidence and severity measurements**

141 Fruit disease incidence and severity were measured at 1, 2, and 3 days post-inoculation  
142 (dpi). Disease incidence was the percentage of inoculated sites displaying visual signs of tissue  
143 maceration or soft rot. Disease severity was calculated as the average lesion diameter (in mm) of  
144 each inoculation site displaying signs of rot.

## 145 **RNA extraction and library preparation**

146 At 1 dpi, fruit pericarp and epidermal tissue of the blossom end halves of healthy,  
147 wounded, and infected fruit were collected and immediately frozen in liquid nitrogen and lysed  
148 using a Retsch® Mixer Mill MM 400 (Retsch, Germany). RNA was extracted from 1 gram of  
149 ground material as described in Blanco-Ulate *et al.*, 2013. The purity and concentration of the  
150 extracted RNA were determined with a NanoDrop One Spectrophotometer (Thermo Scientific,  
151 USA) and a precise concentration measurement with the Qubit 3 (Invitrogen, USA). The  
152 integrity of the RNA was confirmed via agarose gel electrophoresis.

153 126 cDNA libraries were prepared using the Illumina TruSeq RNA Sample Preparation  
154 Kit v.2 (Illumina, USA) from isolated RNA. Each library was barcoded and analyzed with the  
155 High Sensitivity DNA Analysis Kit for the Agilent 2100 Bioanalyzer (Agilent Technologies,  
156 USA). Libraries were sequenced as single-end 50-bp reads on an Illumina HiSeq 4000 platform  
157 by the DNA Technologies Core at the UC Davis Genome Center.

## 158 **RNA sequencing and data processing**

159 Raw sequencing reads were trimmed for quality and adapter sequences using  
160 Trimmomatic v0.33 (Bolger *et al.*, 2014) with the following parameters: maximum seed  
161 mismatches = 2, palindrome clip threshold = 30, simple clip threshold = 10, minimum leading  
162 quality = 3, minimum trailing quality = 3, window size = 4, required quality = 15, and minimum  
163 length = 36. Trimmed reads were mapped using Bowtie2 (Langmead and Salzberg, 2012) to  
164 combined transcriptomes of tomato (SL4.0 release; <http://solgenomics.net>) and one of the three  
165 pathogens: *B. cinerea* ([http://fungi.ensembl.org/Botrytis\\_cinerea/Info/Index](http://fungi.ensembl.org/Botrytis_cinerea/Info/Index)), *F. acuminatum*  
166 (Petrasch *et al.*, 2019), or *R. stolonifer* (Petrasch *et al.*, 2019). Count matrices were made from  
167 the Bowtie2 results using sam2counts.py v0.91 (<https://github.com/vsbuffalo/sam2counts/>). Only  
168 reads that mapped to the tomato transcriptome were used in the following analyses. A summary  
169 of the read mapping results can be found in **Supplemental Table S1**. The datasets for this study

170 have been deposited in the Gene Expression Omnibus (GEO) database under the accession  
171 GSE148217.

## 172 **Differential expression analysis**

173 The Bioconductor package DESeq2 (Love *et al.*, 2014) was used to perform  
174 normalization of read counts and differential expression analyses for various treatment  
175 comparisons. Differentially expressed (DE) genes for each comparison were those with an  
176 adjusted p-value of less than or equal to 0.05.

## 177 **Functional annotation and enrichment analyses**

178 Gene Ontology (GO) terms were retrieved from SolGenomics. Annotations for  
179 transcription factors and kinases were generated using the automatic annotation tool from iTAK  
180 (Zheng *et al.*, 2016). NBS-LRR family members were identified from Andolfo *et al.*, 2014.  
181 Kyoto Encyclopedia of Genes and Genomes (KEGG) annotations were determined using the  
182 KEGG Automatic Annotation Server (Moriya *et al.*, 2007), and hormone annotations were  
183 derived from these (**Supplemental Table S1**). GO enrichments were performed with the goseq  
184 package in R (Young *et al.*, 2010), while enrichments for all other annotations were performed  
185 using a Fisher test with resulting p-values adjusted via the Benjamini and Hochberg method  
186 (Benjamini and Hochberg, 1995).

## 187 **Measurement of phytohormones**

188 Ethylene emission was measured in MG and RR fruit from the day of harvest through 3  
189 dpi. Headspace gas (3 ml) from weighed fruit in sealed 1-L containers was extracted after 30  
190 minutes in a Shimadzu CG-8A gas chromatograph (Shimadzu Scientific Instruments, Kyoto,  
191 Japan). Sample peaks were measured against an ethylene standard of 1 ppm. Ethylene production  
192 was calculated from the peak height, fruit mass, and incubation time.

193 JA was measured using liquid chromatography coupled to tandem mass spectrometry and  
194 internal standards as in Patton *et al.*, 2020 with modifications. Briefly, frozen tissue was  
195 lyophilized, weighed and extracted in isopropanol:H<sub>2</sub>O:HCL<sub>1MOL</sub>(2:1:0.005) with 100 µl of  
196 internal standard solution (1000 pg) as previously described (Casteel *et al.*, 2015). Samples were  
197 evaporated to dryness, resuspended in 100 µl of MeOH, filtered, and 10 µl samples injected into  
198 an Agilent Technologies 6420 Triple Quad Liquid Chromatography-Tandem Mass Spectrometry  
199 instrument (Agilent, USA). A Zorbax Extend-C18 column 3.0x150mm (Agilent, USA) with  
200 0.1% formic acid in water (A) and 0.1% (v/v) formic acid in acetonitrile (B) at a flow rate of 600

201 mL min<sup>-1</sup> was used. The gradient was 0–1 min, 20% B; 1–10 min, linear gradient to 100% B; 10–  
202 13 min, 100% A.

203

## 204 **Results**

### 205 **Susceptibility of tomato fruit to fungal infections by *Botrytis cinerea*, *Fusarium* 206 *acuminatum*, and *Rhizopus stolonifer* increases during ripening**

207 To characterize tomato fruit responses to fungal infection at unripe (MG) and ripe (RR)  
208 stages, we inoculated fruit (*c.v.* ‘Ailsa Craig’) with *B. cinerea*, *F. acuminatum*, or *R. stolonifer*  
209 spores. Each pathogen successfully infected RR fruit, producing visible water-soaked lesions and  
210 mycelial growth by 3 dpi, whereas MG fruit remained resistant and, except in samples inoculated  
211 with *R. stolonifer*, had a dark, necrotic ring around the inoculation sites (**Fig. 1A**), a feature of  
212 pathogen response that did not appear in wounded fruit. Thus, MG fruit resistance and RR fruit  
213 susceptibility are a feature common to multiple necrotrophic infections. We hypothesized that  
214 these susceptibility phenotypes are the result of (1) differences in defense responses at each  
215 ripening stage and (2) developmental processes during ripening that alter the levels of preformed  
216 defenses and susceptibility factors (**Fig. 1B**). First, we assumed that, compared to a robust  
217 defense response in MG fruit, RR fruit have a weaker response, consisting of fewer genes  
218 induced, less diverse functionality, and absent expression of critical genes. Additionally, we  
219 predicted that ripening may decrease the expression of preformed defenses and increase the  
220 expression of susceptibility factors, which create a more favorable environment for infection.

### 221 **Susceptible ripe fruit respond to pathogens with a larger, more diverse set of defense genes** 222 **than resistant unripe fruit**

223 To test if defense responses to fungal pathogens are compromised in RR compared to  
224 MG fruit, we sequenced mRNA from *B. cinerea*-, *F. acuminatum*-, and *R. stolonifer*-inoculated  
225 fruit at 1 dpi, an early timepoint at which either a resistant or susceptible phenotype becomes  
226 apparent. We included healthy and wounded MG and RR fruit from the same timepoint as  
227 controls. A principal component analysis (PCA) of the mapped normalized reads for all tomato  
228 genes (**Fig. 1C**) revealed that the major driver separating sample data was the ripening stage  
229 (PC1, 69%), while inoculation status accounted for less of the separation (PC2, 20%). The one  
230 exception to this pattern was the *R. stolonifer*-inoculated MG samples, which clustered with the  
231 healthy and wounded MG samples, suggesting that unripe fruit did not display strong responses



232 to this pathogen and yet remained resistant. However, quantification of normalized pathogen  
233 reads (**Supplemental Fig. S1A**) confirmed that all three pathogens were detectable at 1 dpi even  
234 in MG samples.

235 To identify the responses for each ripening stage common to all three pathogens, we  
236 performed a differential expression analysis between inoculated and healthy samples for MG and  
237 RR fruit. We chose the healthy samples as controls for these comparisons in order to capture  
238 responses to necrotrophic infection which may share features with mechanical wounding. Of all  
239 34,075 protein-coding genes found in the tomato transcriptome, 9,366 (27.5%) were found to be  
240 differentially expressed ( $P_{adj} < 0.05$ ) in response to inoculation in fruit at 1 dpi in at least one  
241 comparison (**Supplemental Table S2**). Of these, 475 genes were significantly upregulated in  
242 MG fruit in response to all three pathogens, corresponding to the MG core response (**Fig. 2A**),  
243 whereas 1,538 genes formed the RR core response (**Fig. 2B**). The MG core response overlapped  
244 substantially with the wounding response in MG fruit (**Supplemental Fig. S1B**), which suggests  
245 that unripe fruit activate similar functions when responding to pathogen attack and mechanical  
246 damage. However, this large overlap is also due to the similarity between the gene expression  
247 profiles of wounded and *R. stolonifer*-inoculated samples as seen in the PCA (**Fig. 1C**). In  
248 contrast, the lack of a strong wounding response in RR fruit indicates that nearly all RR core  
249 response genes were strictly pathogen-related (**Supplemental Fig. 1B**). Downregulated genes in  
250 response to infection were largely unique to each pathogen, with only 57 and 225 downregulated  
251 across all three pathogens in MG and RR fruit, respectively, and thus we decided to continue our  
252 analysis only on the upregulated core response genes. Complete lists of gene set intersections of  
253 upregulated and downregulated genes are in **Supplemental Table S3**.

254 We then assessed the MG and RR core responses for the presence of various well-  
255 established gene classifications related to pathogen defense, including selected GO terms, KEGG  
256 pathways, transcription factor (TF) families, hormone biosynthesis, signaling, and response  
257 genes, and receptor-like kinase (RLK) genes (**Fig. 2C**). For each category, we performed  
258 enrichment analyses ( $P_{adj} < 0.05$ ) to identify classifications of particular importance in both MG  
259 and RR core responses. A total of 70 defense genes were identified in the MG core response.  
260 Interestingly, these were enriched in only two categories: chitin catabolic process (GO:0006032)  
261 and RLK genes. The RR core response was enriched in 13 defense categories, including the  
262 plant-pathogen interaction (sly04626) and MAPK signaling pathways (sly4016), secondary

263 metabolite biosynthesis pathways (sly00900, sly00941, sly00945), WRKY and ERF (ethylene  
264 responsive factor) transcription factors, RLKs, and JA biosynthesis. Altogether, 302 defense  
265 genes were identified among the RR core response. Thus, in contrast to their respective  
266 susceptibility phenotypes, RR fruit appear to mount a more robust and diverse defense response  
267 than MG fruit early during inoculation, demonstrating that, contrary to our initial hypothesis,  
268 weakened defense responses in RR fruit are not a contributor to ripening-associated  
269 susceptibility.

270         However, it is possible that tomato fruit resistance to necrotrophs could be determined by  
271 a small number of genes that were exclusive to the MG core response. Out of the 70 defense  
272 genes in the MG core response, 27 were not found in the RR core response (**Fig. 3**). These 27  
273 genes are heterogeneous, representing 12 different defense categories. Notable genes in this  
274 category include a three-gene cluster of *PR-10* family proteins (GO:0006952), a chitinase  
275 previously identified during infections of tomato with *Cladosporium fulvum* (*Solyc10g055810*,  
276 Danhash et al., 1993), and an ERF active at the onset of ripening (Liu *et al.*, 2015b). Although  
277 these 27 genes were not in the RR core response, most of them were induced during RR  
278 infections by one or two of the pathogens studied. Only seven were not upregulated by any of the  
279 three pathogens in RR fruit, including the ERF mentioned above (*Solyc03g118190*), as well as  
280 three RLK genes, two glutaredoxin genes involved in the response to oxidative stress, and a  
281 cysteine protease. Given that each of these genes belongs to a large family of genes whose  
282 members are often functionally redundant, and their average expression levels in infected MG  
283 fruit were fairly low (normalized read counts 8.13 – 149.07), we consider it unlikely that the lack  
284 of these genes in the RR core response contributes heavily to susceptibility.

285         Additionally, the induction of defense genes in the RR core response could be ineffective  
286 if their expression levels were too weak compared to those seen in resistant MG fruit. We  
287 evaluated the levels of gene expression in inoculated RR fruit via a differential expression  
288 comparison ( $P_{\text{adj}} < 0.05$ ) to inoculated MG fruit. Of all the RR core defense genes identified  
289 above, 269/302 (89.1%) are expressed at equal or greater levels (average  $\log_2\text{FC} = 2.16$ ) in  
290 inoculated RR fruit compared to inoculated MG fruit for all three pathogens. Conversely, 33/302  
291 (11.9%) of these defense genes were expressed at higher levels in MG fruit compared to RR fruit  
292 for at least one of the three pathogens (**Supplemental Table S4**). These genes are diverse,  
293 representing 15 different defense categories. Prominent genes in this category include *TAPI*

294 (*Solyc02g079500*) and *TAP2* (*Solyc02g079510*), two peroxidases associated with defensive  
295 suberization in tomato (Roberts and Kolattukudy, 1989; Kesanakurti *et al.*, 2012); *CHI3*  
296 (*Solyc02g082920*) and *CHI17* (*Solyc02g082930*) two chitinases associated with *C. fulvum*  
297 infection (Danhash *et al.*, 1993), and the JA biosynthesis gene *OPR3* (*Solyc07g007870*). While it  
298 is possible that resistance may be determined by these genes, these results indicated that the  
299 differences in defense responses observed between MG and RR fruit are not likely solely  
300 responsible for differences in susceptibility, and, therefore, we considered the alternate  
301 hypothesis.

### 302 **Defects in regulation of ripening result in altered susceptibility to fungal infection**

303 We explored the possibility that the increase in susceptibility to fungal pathogens is  
304 heavily influenced by a decline of preformed defenses and accumulation of susceptibility factors  
305 that occur during fruit ripening prior to pathogen challenge. To identify developmental features  
306 that are integral to fruit resistance or susceptibility, we utilized the isogenic non-ripening tomato  
307 mutants *Cnr*, *rin*, and *nor*, which produce fruit that lack most of the characteristic changes  
308 associated with normal ripening, such as color, texture, acidity, sugar accumulation, and ethylene  
309 production, but yet are phenotypically different from one another. All three mutant lines likely  
310 result from spontaneous gain-of-function mutations in transcription factors with key roles in the  
311 regulation of ripening (Vrebalov *et al.*, 2002; Giovannoni *et al.*, 2004; Manning *et al.*, 2006; Ito  
312 *et al.*, 2017; Wang *et al.*, 2019b; Gao *et al.*, 2019, 2020).

313 We inoculated fruit of these mutant genotypes at comparable stages to MG and RR wild-  
314 type fruit (i.e. “MG-like” and “RR-like”) with *B. cinerea*, *F. acuminatum*, and *R. stolonifer* and  
315 measured disease incidence and severity up to 3 dpi (**Fig. 4**). For all three pathogens at both MG-  
316 like and RR-like stages, only *nor* fruit were consistently resistant to infection. MG-like fruit of  
317 *Cnr* were the only unripe fruit susceptible to any pathogen, with both *B. cinerea* and *F.*  
318 *acuminatum* able to produce lesions on a significant number of these fruit. Consistent with this,  
319 *Cnr* RR-like were more susceptible than wild-type RR fruit to *B. cinerea*, with average disease  
320 severity (i.e. lesion size) nearly twice as great at 3 dpi (**Fig. 4A**). The fruit of *rin* at both MG-like  
321 and RR-like stages showed similar or slightly lower susceptibility to all pathogens when  
322 compared to wild-type, with the exception of a significant reduction in disease incidence to *F.*  
323 *acuminatum* at the RR-like stage. Because some ripening processes may promote susceptibility,  
324 others may maintain resistance, and others may have no impact, we hypothesized that the *Cnr*,

325 *rin*, and *nor* mutations differentially affect ripening-associated genes or pathways that are critical  
326 to tip the balance towards either susceptibility or resistance.

327 We sequenced mRNA from *B. cinerea*-inoculated and healthy fruit from the non-ripening  
328 mutants at MG-like and RR-like stages at 1 dpi. We chose *B. cinerea* inoculations because this  
329 pathogen showed the clearest differences in susceptibility phenotypes between these genotypes.  
330 We first characterized transcriptional responses of mutant fruit to pathogen challenge by using  
331 enrichment analysis of defense-related processes to determine if differences in defense responses  
332 could explain the distinct susceptibility phenotypes (**Supplemental Fig. 2A**). In most cases, the  
333 mutant fruit exhibited similar patterns of defense classification enrichments as wild-type fruit in  
334 both stages, with some notable exceptions. Compared to the other genotype-stage combinations,  
335 *Cnr* MG-like responses were deficient (i.e., less enriched) in the expression of genes from  
336 several prominent defense classifications, including chitin catabolic process (GO:0006032), the  
337 plant-pathogen interaction (sly04626) and glutathione metabolism (sly00480) pathways, ERF  
338 and WRKY transcription factors, and RLK and CAMK genes. Given that *Cnr* fruit were the only  
339 genotype at the MG-like stage to display susceptibility to *B. cinerea* infection, it can be  
340 suggested that these defense processes may be necessary for resistance in unripe fruit. However,  
341 these processes were enriched in the susceptible RR-like fruit of *Cnr* and *rin*, as well as wild-  
342 type RR fruit, which clearly indicates that they are not sufficient to result in a resistant outcome.

343 The role of ethylene and JA showed some variation amongst the mutants. For example,  
344 the responses of resistant *nor* fruit in both MG-like and RR-like fruit were noticeably less  
345 enriched in ethylene-associated pathways and more enriched in JA-associated pathways. These  
346 results suggest that JA-mediated defenses may contribute to tomato fruit resistance in the  
347 absence of ethylene, and that the *nor* mutation may activate JA-associated resistance. In support  
348 of this observation, levels of JA in healthy fruit appeared to be linked to resistance: they were  
349 highest in RR-like *nor* fruit, and only *nor* fruit experienced an increase in JA in the transition  
350 from MG-like to RR-like (**Supplemental Fig. 2B**). However, ethylene levels increase  
351 dramatically during ripening in wild-type fruit, but they remain low and even decrease slightly in  
352 both the susceptible *Cnr* and *rin* fruit as well as the resistant *nor* fruit (**Supplemental Fig. 2C**).  
353 Still, ethylene biosynthesis is induced in all genotypes except *nor* in response to *B. cinerea*  
354 inoculation, and ethylene signaling/response genes are highly enriched in *Cnr* MG-like fruit  
355 (**Supplemental Fig. 2A**). Overall, with the exception of *Cnr* MG-like fruit, resistance or

356 susceptibility in the non-ripening mutants cannot be merely explained by the presence and/or  
357 magnitude of defense responses.

358 **Fruit infections are promoted by a decrease in preformed defenses and an increase in**  
359 **insusceptibility factors during ripening**

360 To identify genes that are involved in resistance or susceptibility that change during  
361 tomato fruit ripening, we used a differential expression analysis ( $P_{\text{adj}} < 0.05$ ) comparing healthy  
362 RR/RR-like to healthy MG/MG-like fruit for each wild-type and mutant lines. In wild-type fruit,  
363 6,574 genes were significantly downregulated in RR fruit compared to MG, while 5,674 genes  
364 were significantly upregulated (**Supplemental Table S2**). We used the susceptibility phenotypes  
365 and the transcriptional profiles of the mutant fruit to filter these ripening-associated genes and  
366 identify critical preformed defense mechanisms or susceptibility factors. Of the four genotypes,  
367 all except *nor* experience an increase in susceptibility in the transition from MG/MG-like to  
368 RR/RR-like fruit. Thus, we selected ripening-associated genes that showed the same expression  
369 pattern in wild-type, *Cnr* and/or *rin*, but not *nor*. This filtering resulted in 2,893 downregulated  
370 and 2,003 upregulated genes, respectively.

371 We assumed that effective preformed defenses will decrease during ripening. Thus, the  
372 set of filtered downregulated genes, being those that are highly expressed in healthy MG fruit  
373 compared to healthy RR fruit, should contain key genes related to preformed defenses. The  
374 filtered downregulated genes contained 251 defense genes, while upregulated genes included  
375 only 171 defense genes, indicating a net loss of about 80 genes in the transition from MG/MG-  
376 like to RR/RR-like susceptible fruit. Furthermore, the 251 defense genes from the filtered  
377 downregulated set were overrepresented by functional categories involved in reactive oxygen  
378 species (ROS) response and detoxification, proteolysis, and the biosynthesis of secondary  
379 metabolites (**Table 1**). These downregulated ROS-related genes spanned several subfamilies  
380 including thioredoxins, glutaredoxins, glutathione S-transferases, and peroxidases. Among the  
381 downregulated proteolytic genes were several subtilisin-like proteases, including *SBT3*  
382 (*Solyc01g087850*; Meyer et al., 2016). Lastly, in addition to several genes involved the  
383 methylerythritol 4-phosphate (MEP) pathway of terpenoid biosynthesis, two copies of the lignin  
384 biosynthesis gene *CCoAOMT* (*Solyc01g107910*, *Solyc04g063210*) were also among the filtered  
385 downregulated class, suggesting that cell wall fortification could be inhibited upon infection.  
386 These results indicate that ripening involves a loss of multiple defense genes, and that the

387 preexisting levels of genes involved in ROS regulation, proteolysis, and secondary metabolite  
388 biosynthesis may be critical for resistance.

389 Finally, we evaluated filtered upregulated genes that are highly expressed in healthy RR  
390 fruit compared to healthy MG fruit, as they may include potential susceptibility factors. Since  
391 there is little scientific literature on classes of genes that may constitute susceptibility factors in  
392 plants, we focused on the upregulated genes that were highly expressed in the RR/RR-like fruit  
393 of the susceptible genotypes. Such genes may have disproportionate impacts on susceptibility  
394 due to their high expression. To identify these genes, we calculated average normalized read  
395 count values for each gene across WT, *Cnr*, and *rin* RR/RR-like fruit. The distribution of these  
396 values over the filtered upregulated genes is a notably long-tailed distribution with a range of  
397 2.43 to 179,649.29 and an average of 1,295. We identified genes with abnormally high  
398 expression values by selecting outliers (i.e., values above  $1.5 * \text{the inter-quartile range}$ ) from a  
399  $\log_{10}$ -transformed distribution of the data. This resulted in a list of 16 genes (**Table 2**). They  
400 include several genes previously discovered to be active during tomato fruit ripening, including  
401 the flavor volatile biosynthesis gene *ADH2* (*Solyc06g059740*; Speirs et al., 1998), the carotenoid  
402 biosynthesis gene *Z-ISO* (*Solyc12g098710*; Fantini et al., 2013), the pectin-degrading enzymes  
403 *PG2a* (*Solyc10g080210*; Sheehy et al., 1987) and *PL* (*Solyc03g111690*; Uluisik et al., 2016), and  
404 the ethylene receptor *ETR4* (*Solyc06g053710*; Tieman and Klee, 1999), among other genes  
405 involved in carbohydrate metabolism.

406 While any of these genes has the potential to impact susceptibility, cell wall-degrading  
407 enzymes such as *PL* and *PG2a*, which facilitate fruit softening during ripening, represent  
408 especially good candidates given both the importance of cell wall integrity in defense against  
409 fungal pathogens and previous research on RNAi-developed mutants in tomato (Cantu et al.,  
410 2008; Yang et al., 2017). To validate the impact of *PG2a* and *PL* expression in wild-type RR  
411 fruit on susceptibility to *B. cinerea*, we utilized CRISPR-based mutants in each of these genes  
412 (Wang et al., 2019a). RR fruit of the CRISPR-*PL* line, but not the CRISPR-*PG2a* mutant,  
413 demonstrated reduced susceptibility to *B. cinerea* compared to the azygous WT control line (**Fig.**  
414 **5**). At 3 dpi, disease incidence in the *PL* lines was 56% lower than azygous lines. We concluded  
415 that the ripening-associated pectate lyase enzyme is a major susceptibility factor for *B. cinerea*  
416 infection in tomato fruit.

417

## 418 Discussion

419 Increased susceptibility to fungal pathogens during ripening is a feature of many fleshy  
420 fruit. During ripening, fruit may gradually lose either the ability to activate or the effectiveness  
421 of components of the plant immune system, defensive hormone production and signaling, and  
422 downstream transcriptional responses. Alternatively, ripening processes such as cell wall  
423 breakdown, simple sugar accumulation, changes in pH and secondary metabolite composition,  
424 and, in climacteric fruit, increased levels of ethylene, may impact the fruit's capability to resist  
425 fungal attack (Prusky *et al.*, 2013; Alkan and Fortes, 2015). The widespread nature of this  
426 phenomenon in diverse fruit pathosystems suggests that ripening-associated susceptibility is  
427 likely to be mediated by combinations of the above factors.

428 In tomato, ripening-associated susceptibility has been demonstrated not only for the  
429 model necrotrophic pathogen *Botrytis cinerea*, but for other fungal pathogens including  
430 *Colletotrichum gloeosporioides* (Alkan *et al.*, 2015), *Rhizopus stolonifer*, and *Fusarium*  
431 *acuminatum* (Petrasch *et al.*, 2019). Here, for the first time, we identified specific host responses  
432 in both resistant unripe (MG) and susceptible ripe (RR) fruit that are common to multiple  
433 pathogens and thus represent core responses to fungal infection. Most prominently, these core  
434 responses featured RLKs, WRKY and ERF transcription factors, JA biosynthesis, and chitin  
435 catabolism. Some genes that appear in both the MG core and RR core responses were  
436 previously-studied components of plant immunity in tomato, including the JA biosynthesis gene  
437 *LoxD* (Yan *et al.*, 2013), the subtilisin-like protease *SBT3* (Meyer *et al.*, 2016), the peroxidase  
438 *CEVI-1* (Mayda *et al.*, 2000), and the chitinase *CHI9* (Danhash *et al.*, 1993).

439 However, most defense genes uncovered were found solely in the RR core response.  
440 These included several well-known defense genes that were only expressed in RR fruit, such as  
441 *WRKY33* (Liu *et al.*, 2015a), the ERF *PTI5* (He *et al.*, 2001; Gu *et al.*, 2002; Wu *et al.*, 2015),  
442 the RLK *TPK1b* (AbuQamar *et al.*, 2008), and the MAP kinase *MPK3* (Kandoth *et al.*, 2007;  
443 Stulemeijer *et al.*, 2007; Zhang *et al.*, 2018). While the MG core response did contain some  
444 defense genes that were not found in the RR core response, expression of most of these genes  
445 was found in the RR response to one or two pathogens. Many of these were functionally similar  
446 to other RR core response genes, and were not expressed at high levels in inoculated fruit. Thus,  
447 the ability to quickly express a large amount of defense genes at high levels does not appear to be

448 compromised in RR fruit, and ripening-associated susceptibility is therefore not sufficiently  
449 explained by differences in the diversity or magnitude of defense responses.

450         If defense responses do not determine the outcome of the interaction in tomato fruit,  
451 developmental features associated with ripening of healthy fruit may instead govern  
452 susceptibility. The highly complex transcriptional reprogramming during ripening allows for a  
453 large number of potential contributors to the increase in susceptibility. Ripening processes in  
454 tomato have been studied using non-ripening mutants such as *Cnr*, *rin*, and *nor*. In addition to  
455 being phenotypically distinct, these mutants display differential susceptibility patterns when  
456 inoculated with fungal pathogens. Previously, susceptibility to *B. cinerea* in tomato fruit was  
457 shown to be dependent on *NOR* but not *RIN*, though the role of *CNR* remained uncharacterized  
458 (Cantu *et al.*, 2009). Our results with *B. cinerea* as well as *F. acuminatum* and *R. stolonifer*  
459 corroborate the roles of *NOR* and *RIN* while also proposing a role for *CNR* in tomato fruit  
460 defense against fungal pathogens. In addition to exhibiting hypersusceptibility to *B. cinerea* in  
461 RR-like fruit, *Cnr* MG-like fruit were the only fruit of this stage to exhibit any susceptibility.  
462 Unlike *rin* and *nor* fruit, *Cnr* fruit have altered cell wall architecture even in MG-like stages  
463 (Eriksson *et al.*, 2004; Ordaz-Ortiz *et al.*, 2009), a feature which may be exploited during fungal  
464 infection. Moreover, compared to all other fruit, *Cnr* MG-like fruit were deficient in their  
465 defense responses against *B. cinerea*. However, apart from *Cnr* MG-like fruit, differences in  
466 defense responses appeared to have little impact on susceptibility, as enriched defense categories  
467 were similar across both resistant and susceptible mutant fruit.

468         We took advantage of the susceptibility differences in the ripening mutants to unravel  
469 ripening components that may represent either declining preformed defenses or increasing  
470 susceptibility factors. Differential expression analyses carefully filtered based on susceptibility  
471 phenotypes revealed that several defense-related genes undergo changes in gene expression  
472 during the transition from MG/MG-like to RR/RR-like fruit. Most interestingly, declining  
473 preformed defenses appear to be overrepresented by gene categories involved in the mediation of  
474 ROS levels. Host regulation of ROS levels during early fungal infection is critical for both  
475 defense signaling and detoxification of ROS generated by the pathogen (Lehmann *et al.*, 2015;  
476 Waszczak *et al.*, 2018), and tomato fruit susceptibility to *B. cinerea* has been shown to be  
477 impacted by both of these roles. Improved resistance to *B. cinerea* in the ABA-deficient *sitiens*  
478 mutant has been shown to be the result of controlled ROS production, which promotes cell wall



479 fortification (Asselbergh *et al.*, 2007; Curvers *et al.*, 2010), and a similar improved *B. cinerea*  
480 resistance is seen in tomato varieties genetically engineered to produce especially high amounts  
481 of antioxidant anthocyanins in fruit (Zhang *et al.*, 2015). During ripening, losing control of ROS  
482 levels may thus represent the reduction of an important preformed defense.

483         Some features of ripening have the potential to be either a preformed defense or a  
484 susceptibility factor depending on the context. The ethylene burst that accompanies ripening in  
485 climacteric fruit is an example. Although ethylene is known for its involvement in defense  
486 against necrotrophs (van der Ent and Pieterse, 2012), its induction of the ripening program  
487 catalyzes downstream events that can be favorable for pathogen infections. Previous research  
488 suggests that inhibition of ethylene receptors in MG fruit can either increase or decrease  
489 resistance to *B. cinerea* depending on the concentration of inhibitor used (Blanco-Ulate *et al.*,  
490 2013). Thus, ethylene-mediated resistance may be dependent on careful regulation of ethylene  
491 levels, and the autocatalytic ethylene biosynthesis that occurs in wild-type fruit ripening may be  
492 detrimental. We observed that, although ethylene levels in healthy fruit did not correlate well  
493 with susceptibility, ethylene-related transcriptional responses were particularly prominent in  
494 susceptible fruit, especially *Cnr* MG-like. In addition to ethylene, JA is known to mediate  
495 resistance to necrotrophs in plants (Wasternack and Hause, 2013; Pandey *et al.*, 2016). The  
496 enrichment of JA biosynthesis genes is seen in the RR core response, as well as the response to  
497 *B. cinerea* in all mutant fruit at both stages. Basal levels of JA in healthy fruit are highest in *nor*  
498 RR-like fruit, where they are nearly twice as high as levels in wild-type RR fruit. Moreover, *nor*  
499 fruit are the only fruit at which JA signaling/response genes are enriched in response to *B.*  
500 *cinerea* infection at both stages. Although JA is linked to the promotion of fruit ripening (Peña-  
501 Cortés *et al.*, 2004), its role is much less prominent than ethylene, which may allow it to play a  
502 defense role in fruit without having the unintended consequence of promoting ripening and, in  
503 turn, susceptibility. However, the interplay between ethylene and JA and their impact of  
504 ripening-associated susceptibility requires further study.

505         Other features of ripening can increase susceptibility to fungal disease such as the  
506 disassembly of plant cell walls leading to fruit softening. Cell wall polysaccharide remodeling,  
507 breakdown, and solubilization in ripening fruit occurs as the result of various cell wall-degrading  
508 enzymes, particularly those that act on pectin (Brummell, 2006). The cell wall represents an  
509 important physical barrier to pathogen attack in plants (Malinovsky *et al.*, 2014), and cell wall

510 integrity and fortification improves tomato fruit resistance to *B. cinerea* infection (Cantu et al.,  
511 2008; Curvers et al., 2010). The enzymes PL and PG2a feature prominently in tomato fruit  
512 ripening and softening (Uluşik *et al.*, 2016; Yang *et al.*, 2017; Wang *et al.*, 2019a) and  
513 accumulate in RR/RR-like fruit of susceptible genotypes. However, these enzymes do not have  
514 equal impact on fruit softening, as CRISPR-based mutants in *PL*, but not *PG2a*, result in a  
515 reduced rate of softening in RR fruit (Wang *et al.*, 2019a). This differential impact on firmness is  
516 mirrored in the effect on susceptibility to *B. cinerea*, as the firmer CRISPR-PL mutant was less  
517 susceptible than both the CRISPR-PG2a mutant and the azygous control. Though RR fruit of the  
518 CRISPR-PG2a mutant did not exhibit increased *B. cinerea* resistance, PG2a may still contribute  
519 to susceptibility, as RNAi-mediated knockdown of *PG2a* together with the expansin gene *Exp1*  
520 increases *B. cinerea* resistance while knockdown of either gene alone does not (Cantu *et al.*,  
521 2008). Regardless, the PL enzyme is a substantial susceptibility factor in tomato fruit and  
522 targeting this enzyme for breeding purposes may improve fungal resistance in addition to  
523 lengthening shelf life by slowing the softening process.

524         Susceptibility and resistance to necrotrophic pathogens is ultimately a complex,  
525 multigenic trait in plants. The use of transcriptomic datasets to facilitate a systems-level  
526 approach of such pathosystems has increased in recent years (Alkan *et al.*, 2015; Petrasch *et al.*,  
527 2019; Zhang *et al.*, 2019; Kovalchuk *et al.*, 2019) and has led to novel insights in both host and  
528 pathogen features that impact the outcome of such interactions. Moreover, the additional layer of  
529 an enormously developmental change such as ripening only further increases the need for these  
530 approaches. We have demonstrated how such an approach can yield critical information on both  
531 fruit infection response and broad ripening-associated changes that increase susceptibility, and  
532 additionally provide insights into single genes with a disparate impact on susceptibility. From  
533 our results, we believe that ripening-associated susceptibility is best explained by a dominant  
534 role of susceptibility factors that increase during ripening which, coupled with a modest loss of  
535 preformed defenses, outweighs the efforts of the defense response in ripe fruit (**Fig. 6**). Overall,  
536 our results have tremendous utility for guiding future study of fruit-pathogen interactions in  
537 addition to providing breeders with information on potentially useful genes for targeting in the  
538 hopes of ultimately reducing postharvest losses in tomatoes and other fruit crops.

## 539 **Supplementary Data**

540 Fig. S1. Pathogen measurements and wound responses.

541 Fig. S2. Defense responses and hormone levels in wild-type and mutant fruit.

542 Table S1. Summaries of read mapping to tomato and pathogen transcriptomes.

543 Table S2. Differential expression output with functional annotations.

544 Table S3. Common and unique differentially expressed genes for fruit inoculated with each  
545 pathogen.

546 Table S4. Core RR response defense genes not expressed at equal or greater levels than MG in  
547 infected fruit.

548 Table S5. Enrichment of defense genes in filtered upregulated/downregulated ripening genes.

549

## 550 **Acknowledgments**

551 This work was supported by start-up funds from the College of Agricultural and Environmental  
552 Sciences and the Department of Plant Sciences (UC Davis) to BB-U. Funding to CJS was  
553 partially provided by the Plant Sciences GSR Award (UC Davis). We would like to acknowledge  
554 Dr. Rosa M. Figueroa-Balderas for advice on RNAseq library preparation. We thank Saskia D.  
555 Mesquida-Pesci, Stefan Petrasch, and Dr. Ann L.T. Powell for valuable feedback on the  
556 manuscript.

## **References**

- AbuQamar S, Chai MF, Luo H, Song F, Mengiste T.** 2008. Tomato protein kinase 1b mediates signaling of plant responses to necrotrophic fungi and insect herbivory. *Plant Cell* **20**, 1964–1983.
- AbuQamar S, Moustafa K, Tran LS.** 2017. Mechanisms and strategies of plant defense against *Botrytis cinerea*. *Critical Reviews in Biotechnology* **37**, 262–274.
- Ahmadi-Afzadi M, Orsel M, Pelletier S, Bruneau M, Proux-Wéra E, Nybom H, Renou J-P.** 2018. Genome-wide expression analysis suggests a role for jasmonates in the resistance to blue mold in apple. *Plant Growth Regulation* **85**, 375–387.
- Alkan N, Fortes AM.** 2015. Insights into molecular and metabolic events associated with fruit response to post-harvest fungal pathogens. *Frontiers in Plant Science* **6**, 889.
- Alkan N, Friedlander G, Ment D, Prusky D, Fluhr R.** 2015. Simultaneous transcriptome

analysis of *Colletotrichum gloeosporioides* and tomato fruit pathosystem reveals novel fungal pathogenicity and fruit defense strategies. *New Phytologist* **205**, 801–815.

**Andolfo G, Jupe F, Witek K, Etherington GJ, Ercolano MR, Jones JDG.** 2014. Defining the full tomato NB-LRR resistance gene repertoire using genomic and cDNA RenSeq. *BMC plant biology* **14**, 120.

**Asselbergh B, Curvers K, Franca SC, Audenaert K, Vuylsteke M, Van Breusegem F, Höfte M.** 2007. Resistance to *Botrytis cinerea* in sitiens, an abscisic acid-deficient tomato mutant, involves timely production of hydrogen peroxide and cell wall modifications in the epidermis. *Plant Physiology* **144**, 1863–77.

**Barral B, Chillet M, Léchaudel M, Lartaud M, Verdeil J-L, Conéjéro G, Schorr-Galindo S.** 2019. An Imaging Approach to Identify Mechanisms of Resistance to Pineapple Fruitlet Core Rot. *Frontiers in Plant Science* **10**, 1065.

**Bautista-Baños S.** 2014. *Postharvest Decay: Control Strategies*.

**Benjamini Y, Hochberg Y.** 1995. Controlling the False Discovery Rate: A Practical and Powerful Approach to Multiple Testing. *Journal of the Royal Statistical Society. Series B (Methodological)* **57**, 289–300.

**Blanco-Ulate B, Vincenti E, Cantu D, Powell ALT.** 2016. *Ripening of tomato fruit and susceptibility to Botrytis cinerea* (S Fillinger and Y Elad, Eds.). Dordrecht, The Netherlands: Springer.

**Blanco-Ulate B, Vincenti E, Powell ALT, Cantu D.** 2013. Tomato transcriptome and mutant analyses suggest a role for plant stress hormones in the interaction between fruit and *Botrytis cinerea*. *Frontiers in Plant Science* **4**, 142.

**Bolger AM, Lohse M, Usadel B.** 2014. Trimmomatic: a flexible trimmer for Illumina sequence data. *Bioinformatics* **30**, 2114–2120.

**Brummell DA.** 2006. Cell wall disassembly in ripening fruit. *Functional Plant Biology* **33**, 103–119.

**Cantu D, Blanco-Ulate B, Yang L, Labavitch JM, Bennett AB, Powell ALT.** 2009. Ripening-regulated susceptibility of tomato fruit to *Botrytis cinerea* requires NOR but not RIN or ethylene. *Plant Physiology* **150**, 1434–1449.

**Cantu D, Vicente AR, Greve LC, Dewey FM, Bennett AB, Labavitch JM, Powell ALT.** 2008. The intersection between cell wall disassembly, ripening, and fruit susceptibility to

*Botrytis cinerea*. Proceedings of the National Academy of Sciences of the United States of America **105**, 859–64.

**Casteel CL, De Alwis M, Bak A, Dong H, Whitham SA, Jander G.** 2015. Disruption of Ethylene Responses by Turnip mosaic virus Mediates Suppression of Plant Defense against the Green Peach Aphid Vector. *Plant physiology* **169**, 209–18.

**Centeno DC, Osorio S, Nunes-Nesi A, et al.** 2011. Malate plays a crucial role in starch metabolism, ripening, and soluble solid content of tomato fruit and affects postharvest softening. *Plant Cell* **23**, 162–184.

**Chiu C-M, You B-J, Chou C-M, Yu P-L, Yu F-Y, Pan S-M, Bostock RM, Chung K-R, Lee M-H.** 2013. Redox status-mediated regulation of gene expression and virulence in the brown rot pathogen *Monilinia fructicola*. *Plant Pathology* **62**, 809–819.

**Curvers K, Seifi H, Mouille G, et al.** 2010. Abscisic Acid Deficiency Causes Changes in Cuticle Permeability and Pectin Composition That Influence Tomato Resistance to *Botrytis cinerea*. *Plant Physiology* **154**, 847–860.

**Danhash N, Wagemakers CA, van Kan JA, de Wit PJ.** 1993. Molecular characterization of four chitinase cDNAs obtained from *Cladosporium fulvum*-infected tomato. *Plant molecular biology* **22**, 1017–29.

**van der Ent S, Pieterse CMJ.** 2012. Ethylene: Multi-Tasker in Plant-Attacker Interactions. *Annual Plant Reviews Volume 44*. Oxford, UK: Wiley-Blackwell, 343–377.

**Eriksson EM, Bovy A, Manning K, Harrison L, Andrews J, De Silva J, Tucker GA, Seymour GB.** 2004. Effect of the Colorless non-ripening mutation on cell wall biochemistry and gene expression during tomato fruit development and ripening. *Plant Physiology* **136**, 4184–97.

**Fantini E, Falcone G, Frusciante S, Giliberto L, Giuliano G.** 2013. Dissection of tomato lycopene biosynthesis through virus-induced gene silencing. *Plant Physiology* **163**, 986–998.

**Gao Y, Wei W, Fan Z, et al.** 2020. Re-evaluation of the nor mutation and the role of the NAC-NOR transcription factor in tomato fruit ripening (F Costa, Ed.). *Journal of Experimental Botany*.

**Gao Y, Zhu N, Zhu X, et al.** 2019. Diversity and redundancy of the ripening regulatory networks revealed by the fruitENCODE and the new CRISPR/Cas9 CNR and NOR mutants. *Horticulture Research* **6**, 39.

**Gell I, De Cal A, Torres R, Usall J, Melgarejo P.** 2008. Relationship between the incidence of

latent infections caused by *Monilinia* spp. and the incidence of brown rot of peach fruit: factors affecting latent infection. *European Journal of Plant Pathology* **121**, 487–498.

**Giovannoni JJ, Tanksley S, Vrebalov J, Noensie F.** 2004. NOR gene compositions and methods for use thereof.

**Gu YQ, Wildermuth MC, Chakravarthy S, Loh YT, Yang C, He X, Han Y, Martin GB.** 2002. Tomato transcription factors Pti4, Pti5, and Pti6 activate defense responses when expressed in *Arabidopsis*. *Plant Cell* **14**, 817–831.

**Gustavsson J, Cederberg C, Sonesson U, van Otterdijk R, Meybeck A.** 2011. *Global food losses and food waste: extent, causes and prevention*.

**He P, Warren RF, Zhao T, Shan L, Zhu L, Tang X, Zhou J-M.** 2001. Overexpression of *Pti5* in Tomato Potentiates Pathogen-Induced Defense Gene Expression and Enhances Disease Resistance to *Pseudomonas syringae* pv. tomato. *Molecular Plant-Microbe Interactions* **14**, 1453–1457.

**Ito Y, Nishizawa-Yokoi A, Endo M, Mikami M, Shima Y, Nakamura N, Kotake-Nara E, Kawasaki S, Toki S.** 2017. Re-evaluation of the rin mutation and the role of RIN in the induction of tomato ripening. *Nature Plants* **3**, 1.

**van Kan JAL, Shaw MW, Grant-Downton RT.** 2014. Botrytis species: Relentless necrotrophic thugs or endophytes gone rogue? *Molecular Plant Pathology* **15**, 957–961.

**Kandath PK, Ranf S, Pancholi SS, Jayanty S, Walla MD, Miller W, Howe GA, Lincoln DE, Stratmann JW.** 2007. Tomato MAPKs LeMPK1, LeMPK2, and LeMPK3 function in the systemin-mediated defense response against herbivorous insects. *Proceedings of the National Academy of Sciences of the United States of America* **104**, 12205–12210.

**Kesanakurti D, Kolattukudy PE, Kirti PB.** 2012. Fruit-specific overexpression of wound-induced tap1 under E8 promoter in tomato confers resistance to fungal pathogens at ripening stage. *Physiologia Plantarum* **146**, 136–148.

**Kovalchuk A, Zeng Z, Ghimire RP, et al.** 2019. Dual RNA-seq analysis provides new insights into interactions between Norway spruce and necrotrophic pathogen *Heterobasidion annosum* s.l. *BMC Plant Biology* **19**, 2.

**Lafuente MT, Ballester A-R, González-Candelas L.** 2019. Involvement of abscisic acid in the resistance of citrus fruit to *Penicillium digitatum* infection. *Postharvest Biology and Technology* **154**, 31–40.

- Langmead B, Salzberg SL.** 2012. Fast gapped-read alignment with Bowtie 2. *Nature Methods* **9**, 357–359.
- Lassois L, Haïssam Jijakli M, Chillet M.** 2010. Crown rot of bananas: preharvest factors involved in postharvest disease development and integrated control methods. *Plant Disease* **94**, 648–658.
- Lehmann S, Serrano M, L’Haridon F, Tjamos SE, Metraux J-P.** 2015. Reactive oxygen species and plant resistance to fungal pathogens. *Phytochemistry* **112**, 54–62.
- Liang X, Rollins JA.** 2018. Mechanisms of Broad Host Range Necrotrophic Pathogenesis in *Sclerotinia sclerotiorum*. *Phytopathology* **108**, 1128–1140.
- Liu S, Kracher B, Ziegler J, Birkenbihl RP, Somssich IE.** 2015*a*. Negative regulation of ABA Signaling By WRKY33 is critical for Arabidopsis immunity towards *Botrytis cinerea* 2100. *eLife* **4**, 1–27.
- Liu M, Pirrello J, Chervin C, Roustan J-P, Bouzayen M.** 2015*b*. Ethylene Control of Fruit Ripening: Revisiting the Complex Network of Transcriptional Regulation. *Plant Physiology* **169**, 2380–90.
- Love MI, Huber W, Anders S.** 2014. Moderated estimation of fold change and dispersion for RNA-seq data with DESeq2. *Genome Biology* **15**, 550.
- Malinovsky FG, Fangel JU, Willats WGT.** 2014. The role of the cell wall in plant immunity. *Frontiers in Plant Science* **5**, 1–12.
- Manning K, Tör M, Poole M, Hong Y, Thompson AJ, King GJ, Giovannoni JJ, Seymour GB.** 2006. A naturally occurring epigenetic mutation in a gene encoding an SBP-box transcription factor inhibits tomato fruit ripening. *Nature Genetics* **38**, 948–952.
- Mayda E, Marqués C, Conejero V, Vera P.** 2000. Expression of a Pathogen-Induced Gene Can Be Mimicked by Auxin Insensitivity. *Molecular Plant-Microbe Interactions* **13**, 23–31.
- Mbengue M, Navaud O, Peyraud R, Barascud M, Badet T, Vincent R, Barbacci A, Raffaele S.** 2016. Emerging Trends in Molecular Interactions between Plants and the Broad Host Range Fungal Pathogens *Botrytis cinerea* and *Sclerotinia sclerotiorum*. *Frontiers in Plant Science* **7**, 1–9.
- Meyer M, Huttenlocher F, Cedzich A, Procopio S, Stroeder J, Pau-Roblot C, Lequart-Pillon M, Pelloux J, Stintzi A, Schaller A.** 2016. The subtilisin-like protease SBT3 contributes to insect resistance in tomato. *Journal of Experimental Botany* **67**, 4325–4338.

- Morales H, Barros G, Marín S, Chulze S, Ramos AJ, Sanchis V.** 2008. Effects of apple and pear varieties and pH on patulin accumulation by *Penicillium expansum*. *Journal of the Science of Food and Agriculture* **88**, 2738–2743.
- Moriya Y, Itoh M, Okuda S, Yoshizawa AC, Kanehisa M.** 2007. KAAS: an automatic genome annotation and pathway reconstruction server. *Nucleic Acids Research* **35**, W182–W185.
- Nunes CA.** 2012. Biological control of postharvest diseases of fruit. *European Journal of Plant Pathology* **133**, 181–196.
- Ordaz-Ortiz JJ, Marcus SE, Paul Knox J.** 2009. Cell Wall Microstructure Analysis Implicates Hemicellulose Polysaccharides in Cell Adhesion in Tomato Fruit Pericarp Parenchyma. *Molecular Plant* **2**, 910–921.
- Pandey D, Rajendran SRCK, Gaur M, Sajeesh PK, Kumar A.** 2016. Plant Defense Signaling and Responses Against Necrotrophic Fungal Pathogens. *Journal of Plant Growth Regulation* **35**, 1159–1174.
- Patton MF, Bak A, Sayre JM, Heck ML, Casteel CL.** 2020. A polerovirus, Potato leafroll virus, alters plant–vector interactions using three viral proteins. *Plant, Cell & Environment* **43**, 387–399.
- Peña-Cortés H, Barrios P, Dorta F, Polanco V, Sánchez C, Sánchez E, Ramírez I.** 2004. Involvement of Jasmonic Acid and Derivatives in Plant Response to Pathogen and Insects and in Fruit Ripening. *Journal of Plant Growth Regulation* **23**, 246–260.
- Petrasch S, Silva CJ, Mesquida-Pesci SD, Gallegos K, van den Abeele C, Papin V, Fernandez-Acero FJ, Knapp SJ, Blanco-Ulate B.** 2019. Infection Strategies Deployed by *Botrytis cinerea*, *Fusarium acuminatum*, and *Rhizopus stolonifer* as a Function of Tomato Fruit Ripening Stage. *Frontiers in Plant Science* **10**, 223.
- Prusky D.** 1996. Pathogen Quiescence in Postharvest Diseases. *Annual Review of Phytopathology* **34**, 413–434.
- Prusky D, Alkan N, Mengiste T, Fluhr R.** 2013. Quiescent and Necrotrophic Lifestyle Choice During Postharvest Disease Development. *Annual Review of Phytopathology* **51**, 155–176.
- Roberts E, Kolattukudy PE.** 1989. Molecular cloning, nucleotide sequence, and abscisic acid induction of a suberization-associated highly anionic peroxidase. *Molecular & general genetics* **217**, 223–32.



- van Schie CCN, Takken FLW.** 2014. Susceptibility Genes 101: How to Be a Good Host. *Annual Review of Phytopathology* **52**, 551–581.
- Sharma RR, Singh D, Singh R.** 2009. Biological control of postharvest diseases of fruits and vegetables by microbial antagonists: A review. *Biological Control* **50**, 205–221.
- Sheehy RE, Pearson J, Brady CJ, Hiatt WR.** 1987. Molecular characterization of tomato fruit polygalacturonase. *MGG Molecular & General Genetics* **208**, 30–36.
- Speirs J, Lee E, Holt K, Yong-Duk K, Scott NS, Loveys B, Schuch W.** 1998. Genetic manipulation of alcohol dehydrogenase levels in ripening tomato fruit affects the balance of some flavor aldehydes and alcohols. *Plant Physiology* **117**, 1047–1058.
- Stulemeijer IJE, Stratmann JW, Joosten MHAJ.** 2007. Tomato mitogen-activated protein kinases LeMPK1, LeMPK2, and LeMPK3 are activated during the Cf-4/Avr4-induced hypersensitive response and have distinct phosphorylation specificities. *Plant Physiology* **144**, 1481–1494.
- Tieman DM, Klee HJ.** 1999. Differential expression of two novel members of the tomato ethylene-receptor family. *Plant Physiology* **120**, 165–172.
- Ulusik S, Chapman NH, Smith R, et al.** 2016. Genetic improvement of tomato by targeted control of fruit softening. *Nature Biotechnology* **34**, 950–952.
- Veloso J, van Kan JAL.** 2018. Many Shades of Grey in Botrytis-Host Plant Interactions. *Trends in Plant Science* **23**, 613–622.
- Veronese P, Ruiz MT, Coca MA, et al.** 2003. In defense against pathogens. Both plant sentinels and foot soldiers need to know the enemy. *Plant Physiology* **131**, 1580–1590.
- Vrebalov J, Ruezinsky D, Padmanabhan V, White R, Medrano D, Drake R, Schuch W, Giovannoni JJ.** 2002. A MADS-box gene necessary for fruit ripening at the tomato ripening-inhibitor (*rin*) locus. *Science* **296**, 343–6.
- Wang D, Samsulrizal N, Yan C, et al.** 2019a. Characterisation of CRISPR mutants targeting genes modulating pectin degradation in ripening tomato. *Plant Physiology* **179**, 544–557.
- Wang R, Tavano EC da R, Lammers M, Martinelli AP, Angenent GC, de Maagd RA.** 2019b. Re-evaluation of transcription factor function in tomato fruit development and ripening with CRISPR/Cas9-mutagenesis. *Scientific Reports* **9**, 1696.
- Wasternack C, Hause B.** 2013. Jasmonates: Biosynthesis, perception, signal transduction and action in plant stress response, growth and development. An update to the 2007 review in *Annals*

of Botany. *Annals of Botany* **111**, 1021–1058.

**Waszczak C, Carmody M, Kangasjärvi J.** 2018. Reactive Oxygen Species in Plant Signaling. *Annual Review of Plant Biology* **69**, 209–236.

**Wittstock U, Gershenzon J.** 2002. Constitutive plant toxins and their role in defense against herbivores and pathogens. *Current Opinion in Plant Biology* **5**, 300–307.

**Wu C, Avila CA, Goggin FL.** 2015. The ethylene response factor Pti5 contributes to potato aphid resistance in tomato independent of ethylene signalling. *Journal of Experimental Botany* **66**, 559–570.

**Yan L, Zhai Q, Wei J, et al.** 2013. Role of Tomato Lipoxygenase D in Wound-Induced Jasmonate Biosynthesis and Plant Immunity to Insect Herbivores (H Yu, Ed.). *PLoS Genetics* **9**, e1003964.

**Yang L, Huang W, Xiong F, Xian Z, Su D, Ren M, Li Z.** 2017. Silencing of SIPL, which encodes a pectate lyase in tomato, confers enhanced fruit firmness, prolonged shelf-life and reduced susceptibility to grey mould. *Plant Biotechnology Journal* **15**, 1544–1555.

**Young MD, Wakefield MJ, Smyth GK, Oshlack A.** 2010. Gene ontology analysis for RNA-seq: accounting for selection bias. *Genome Biology* **11**, R14.

**Zhang JX, Bruton BD, Miller ME, Isakeit T.** 1999. Relationship of Developmental Stage of Cantaloupe Fruit to Black Rot Susceptibility and Enzyme Production by *Didymella bryoniae*. *Plant Disease* **83**, 1025–1032.

**Zhang W, Corwin JA, Copeland DH, Feusier J, Eshbaugh R, Cook DE, Atwell S, Kliebenstein DJ.** 2019. Plant–necrotroph co-transcriptome networks illuminate a metabolic battlefield. *eLife* **8**.

**Zhang Y, de Stefano R, Robine M, Butelli E, Bulling K, Hill L, Rejzek M, Martin C, Schoonbeek H.** 2015. Different ROS-Scavenging Properties of Flavonoids Determine Their Abilities to Extend Shelf Life of Tomato. *Plant Physiology* **169**, pp.00346.2015.

**Zhang S, Wang L, Zhao R, Yu W, Li R, Li Y, Sheng J, Shen L.** 2018. Knockout of *SIMAPK3* Reduced Disease Resistance to *Botrytis cinerea* in Tomato Plants. *Journal of Agricultural and Food Chemistry* **66**, 8949–8956.

**Zheng Y, Jiao C, Sun H, et al.** 2016. iTAK: A Program for Genome-wide Prediction and Classification of Plant Transcription Factors, Transcriptional Regulators, and Protein Kinases. *Molecular Plant* **9**, 1667–1670.

## Tables

**Table 1.** Defense categories enriched in a subset of significantly downregulated genes during ripening of healthy tomato fruit. The significance cut-off for the enrichments is  $P_{adj} < 0.05$ . Full enrichment results for both upregulated and downregulated defense genes can be found in **Supplemental Table S5**.

| Defense Category                                 | Number of Genes | Example Functions                                    |
|--------------------------------------------------|-----------------|------------------------------------------------------|
| Cell redox homeostasis (GO:0045454)              | 24              | Thioredoxins, glutaredoxins                          |
| Defense response (GO:0006952)                    | 6               | MLO-like proteins, Sn-1 proteins                     |
| Proteolysis (GO:0006508)                         | 36              | Subtilisin-like proteases (SBT2, SBT3)               |
| Response to oxidative stress (GO:0006979)        | 16              | Peroxidases                                          |
| Flavonoid biosynthesis (sly00941)                | 5               | Caffeoyl-CoA O-methyltransferase                     |
| Glutathione metabolism (sly00480)                | 18              | Glutathione S-transferases                           |
| MAPK signaling pathway (sly04016)                | 17              | Protein phosphatase 2C, RBOH proteins                |
| Phosphatidylinositol signaling system (sly04070) | 5               | Phosphatidylinositol phospholipase C                 |
| Plant-pathogen interaction (sly04626)            | 15              | Disease resistance protein RPM1                      |
| Terpenoid backbone biosynthesis (sly00900)       | 8               | Geranylgeranyl diphosphate synthase                  |
| CAMK                                             | 8               | Calcium-dependent kinases                            |
| RLK                                              | 78              | Lectin receptor kinases, Leucine-rich repeat kinases |
| ERF                                              | 8               | ERFA2, ERFC2, ERFC3                                  |

**Table 2.** Highly expressed genes in susceptible RR/RR-like fruit. Names and ripening functions were determined via BLAST and literature searches.

| <b>Accession</b>      | <b>Average RR/RR-like Expression</b> | <b>Name</b>    | <b>Ripening Function</b>     |
|-----------------------|--------------------------------------|----------------|------------------------------|
| <i>Solyc06g059740</i> | 99,772.18                            | <i>SIADH2</i>  | Flavor aldehyde biosynthesis |
| <i>Solyc08g065610</i> | 64,989.08                            | <i>SIVPE3</i>  | Sugar metabolism             |
| <i>Solyc03g111690</i> | 25,643.87                            | <i>SIPL</i>    | Pectin degradation           |
| <i>Solyc10g080210</i> | 25,044.06                            | <i>SIPG2a</i>  | Pectin degradation           |
| <i>Solyc08g014130</i> | 21,514.72                            | <i>SIIPMS2</i> | Unknown                      |
| <i>Solyc10g076510</i> | 20,051.40                            | --             | Unknown                      |
| <i>Solyc07g047800</i> | 19,462.21                            | --             | Unknown                      |
| <i>Solyc12g005860</i> | 19,048.01                            | --             | Unknown                      |
| <i>Solyc08g080640</i> | 17,227.90                            | <i>SINP24</i>  | Unknown                      |
| <i>Solyc12g098710</i> | 15,070.45                            | <i>SIZ-ISO</i> | Carotenoid biosynthesis      |
| <i>Solyc09g009260</i> | 14,572.63                            | <i>SIFBA7</i>  | Sugar metabolism             |
| <i>Solyc10g024420</i> | 14,103.56                            | --             | Unknown                      |

## Figure legends

**Fig. 1: Tomato fruit responses to *B. cinerea*, *F. acuminatum*, and *R. stolonifer*.** (A) Disease progression in inoculated mature green (MG) and red ripe (RR) fruit each day up to 3 days post-inoculation (dpi). (B) Hypotheses of why MG fruit are resistant while RR fruit are susceptible to fungal disease. (C) Principal component analysis of total mapped RNA-Seq tomato reads. Color corresponds to treatment. H = healthy, W = wounded, I = inoculated 1 dpi, B = *B. cinerea*, F = *F. acuminatum*, R = *R. stolonifer*.

**Fig. 2: Tomato core responses to fungal inoculations.** (A-B) Euler diagram of tomato genes upregulated in response to inoculation in (A) mature green (MG) or (B) red ripe (RR) fruit. B = *B. cinerea*, F = *F. acuminatum*, R = *R. stolonifer*. Core responses are shown in white. (C) Enrichments of various defense-related classes in the MG and RR core responses. The scale is the  $\log_{10}(1/P_{adj})$ . Values greater than 10 were converted to 10 for scaling purposes. Numbers in each tile indicate the number of genes within each classification. JA = jasmonic acid, MAPK = mitogen-activated protein kinase, CAMK = calmodulin-dependent protein kinase, RLK = receptor-like kinase, ERF = ethylene responsive factor.

**Fig. 3: Defense genes in the mature green (MG) core response that are not in the red ripe (RR) core response.** Dot sizes are proportional to the average normalized read count values from the inoculated fruit samples. RR= Red Ripe, B = *B. cinerea*, F = *F. acuminatum*, R = *R. stolonifer*, RLK = receptor-like kinase, ERF = ethylene responsive factor.

**Fig. 4. Susceptibility of the non-ripening mutants *Cnr*, *rin*, and *nor* to fungal infections.** (A) Disease incidence and severity measurements for MG-like (left) and RR-like (right) fruit. Wild-type values are included for comparison. (B) Disease progression of *B. cinerea*-inoculated MG-like and RR-like fruit each day up to 3 days post-inoculation.

**Fig. 5. Inoculations of CRISPR lines with *Botrytis cinerea*.** (A) Disease incidence measurements at 1, 2, and 3 dpi. (B) Photos of representative inoculated tomatoes from 0 to 3 dpi.

**Fig. 6. Model of contributing factors to ripening-associated susceptibility in tomato fruit.** Sizes of squares indicate the relative magnitude of that feature in fruit of that stage. The balance between contributing components determines the ultimate outcome of the infection. MG = mature green, RR = red ripe.

## Figures

**Fig. 1**

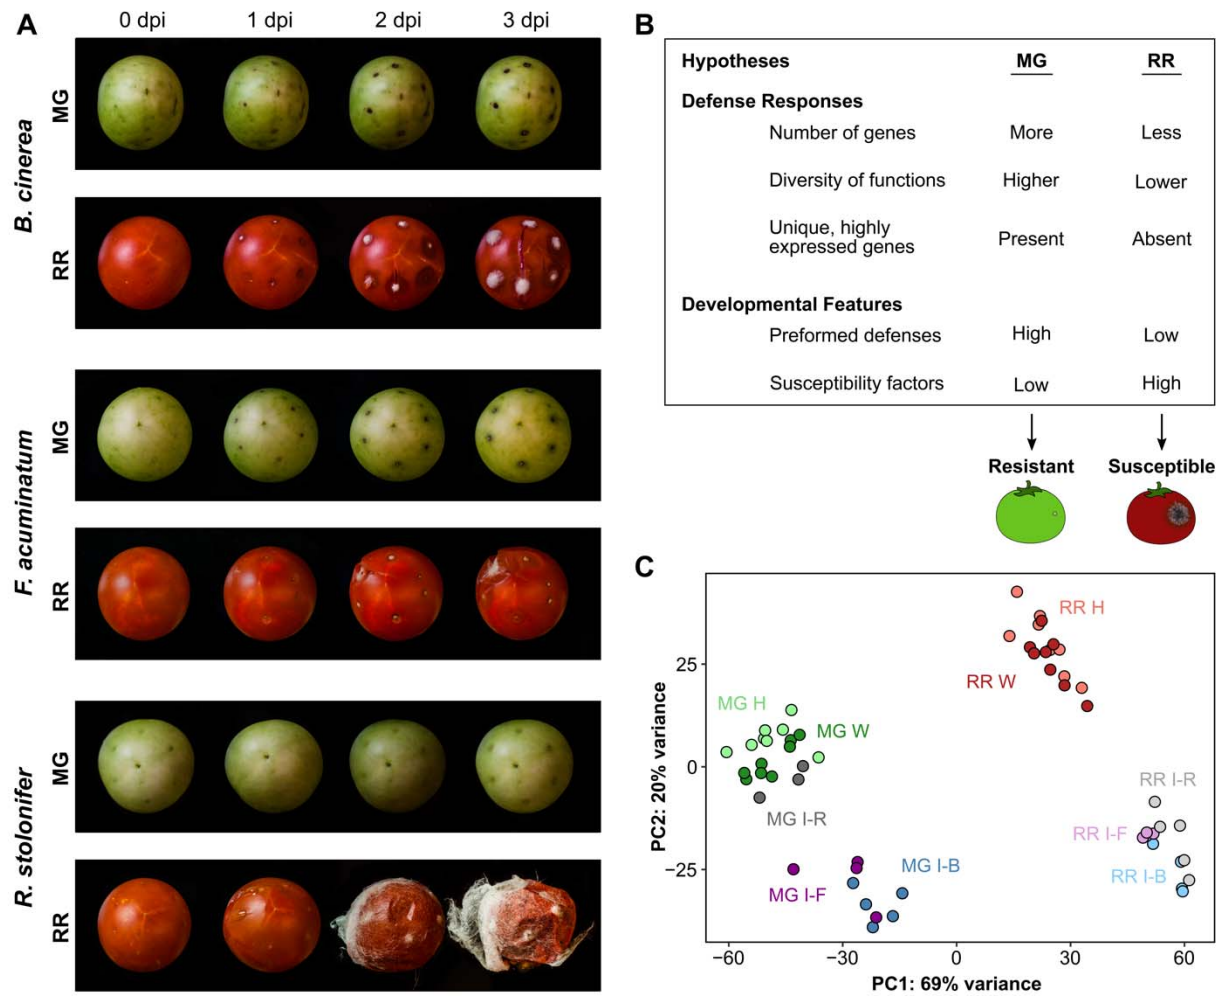

**Fig. 2**

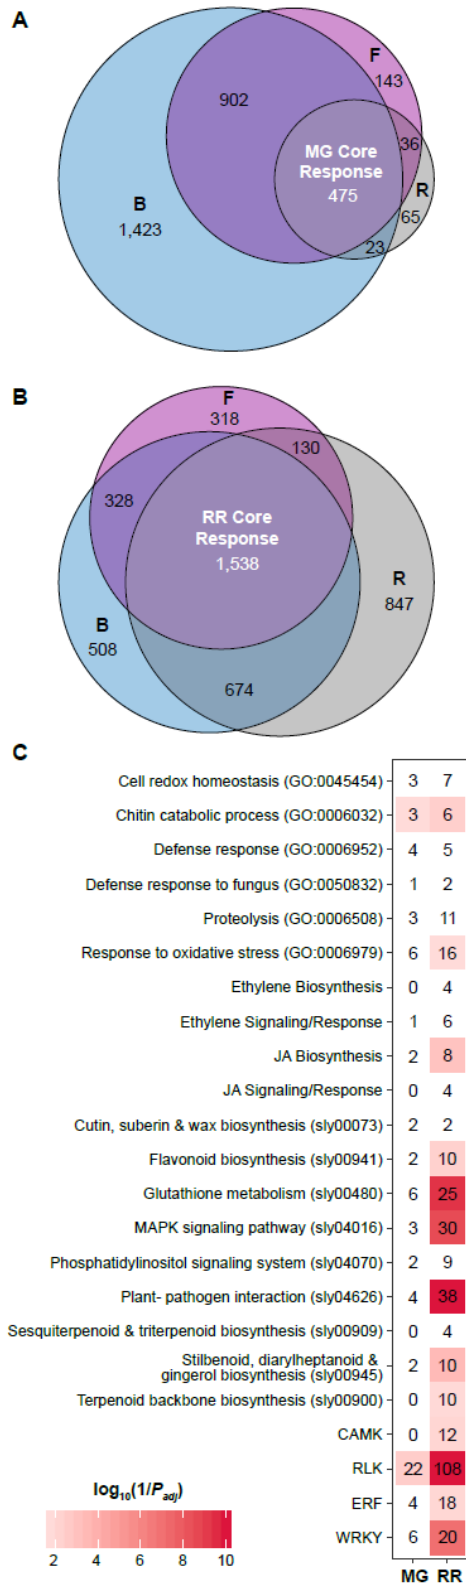

**Fig. 3**

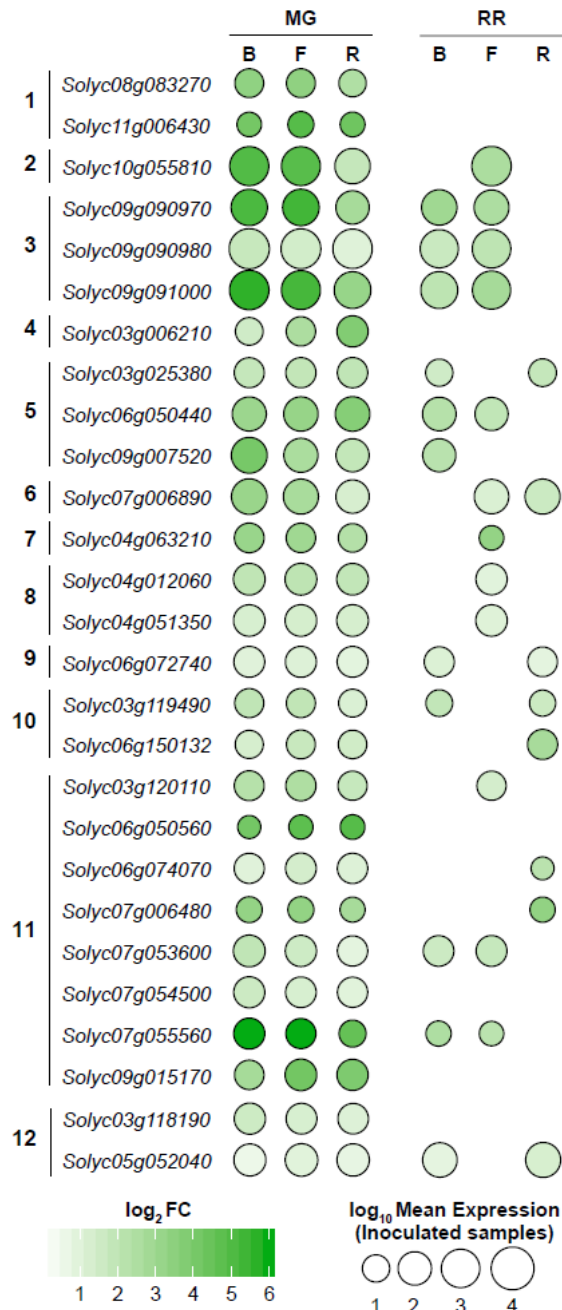

**Defense Categories**

- 1 Cell redox homeostasis (GO:0045454)
- 2 Chitin catabolic process (GO:0006032)
- 3 Defense response (GO:0006952)
- 4 Proteolysis (GO:0006508)
- 5 Response to oxidative stress (GO:0006979)
- 6 Cutin, suberin & wax biosynthesis (sly00073)
- 7 Flavonoid biosynthesis (sly00941) / Stilbenoid, diarylheptanoid & gingerol biosynthesis (sly00945)
- 8 Glutathione metabolism (sly00480)
- 9 Phosphatidylinositol signaling system (sly04070)
- 10 Plant- pathogen interaction (sly04626)
- 11 RLK
- 12 ERF



**Fig. 4**

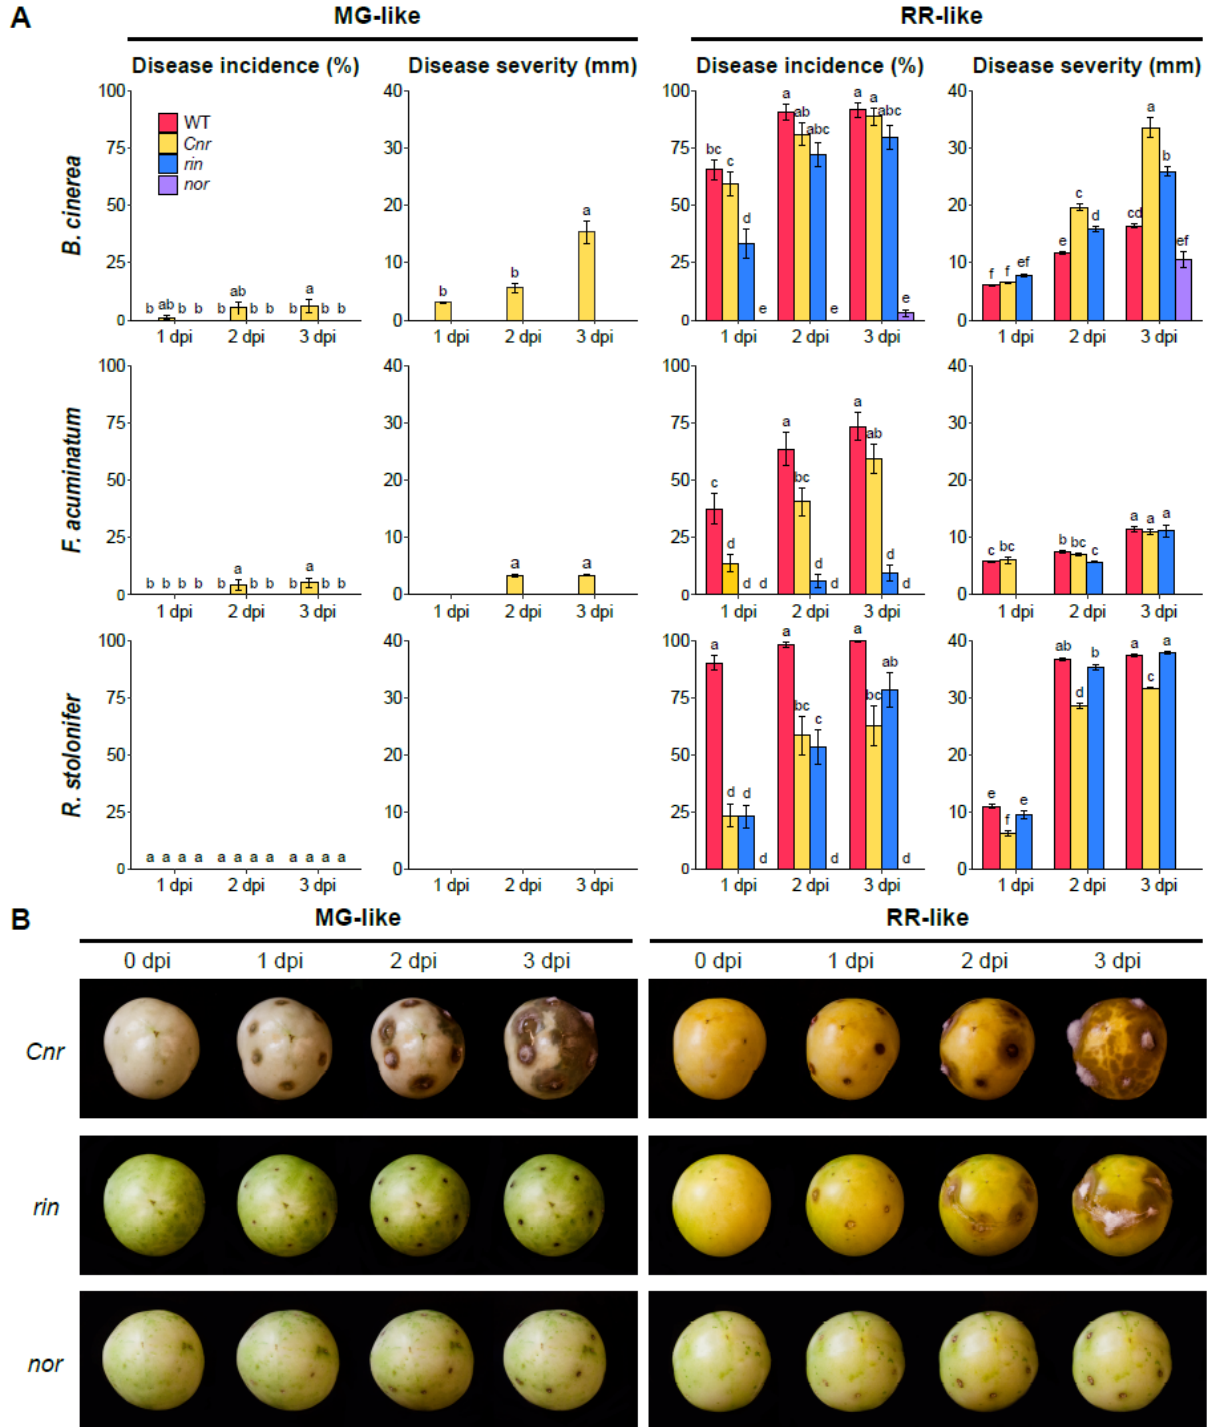

**Fig. 5**

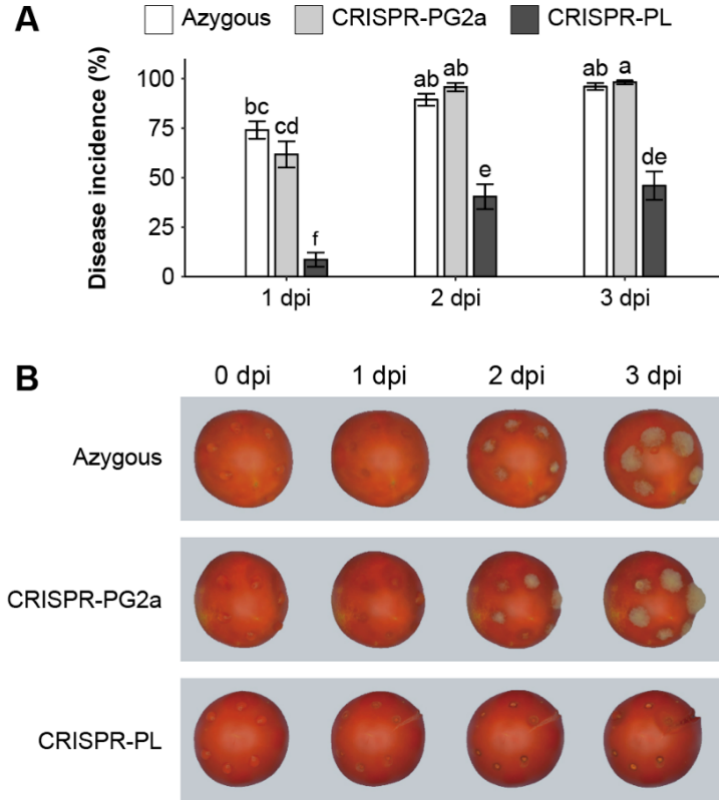

**Fig. 6**

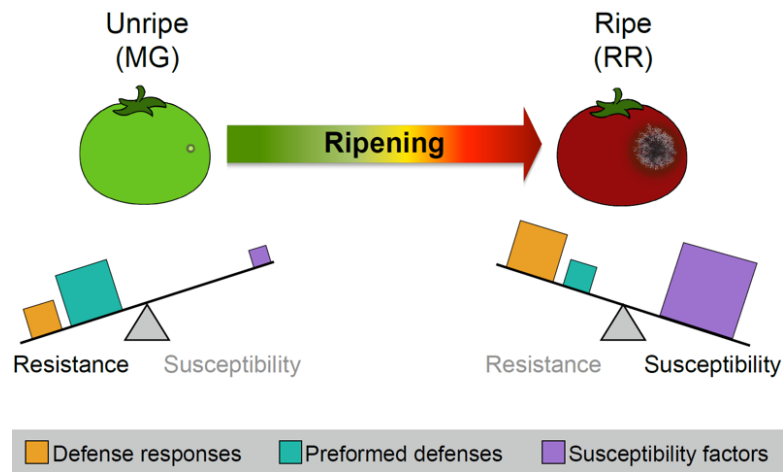

Source: https://biorxiv.org/content/10.1101/2020.06.03.132829v1.full.pdf
